# Supplementary material for: Assessment of Coagulation Parameters in Women Affected by Endometriosis: Validation Study and Systematic Review of the Literature
Source: MDPI journal article supplement (doi:10.3390/diagnostics10080567), 2020-08-07
Supplement: s1 [file s1]

**Supplemental figure 1: Risk of bias assessment.**

|       | Risk of bias domains                 |    |    |    |    |         |  |
|-------|--------------------------------------|----|----|----|----|---------|--|
|       | D1                                   | D2 | D3 | D4 | D5 | Overall |  |
| Study | Cho et al., 2008 [23]                |    |    |    |    |         |  |
|       | Yavzucan et al., 2013 [25]           |    |    |    |    |         |  |
|       | Avcioglu et al., 2014 [26]           |    |    |    |    |         |  |
|       | Kim et al., 2014 [27]                |    |    |    |    |         |  |
|       | Chmaj-Wierzchowska et al., 2015 [13] |    |    |    |    |         |  |
|       | Yang et al., 2015 [24]               |    |    |    |    |         |  |
|       | Wu et al., 2015 [12]                 |    |    |    |    |         |  |
|       | Tokmak et al., 2016 [9]              |    |    |    |    |         |  |
|       | Ding et al., 2018 [29]               |    |    |    |    |         |  |
|       | Seckin et al., 2018 [28]             |    |    |    |    |         |  |
|       | Viganò et al., 2018 [14]             |    |    |    |    |         |  |
|       | Coskun et al., 2019 [32]             |    |    |    |    |         |  |
|       | Ding et al., 2019 [30]               |    |    |    |    |         |  |
|       | Turgut et al., 2019 [31]             |    |    |    |    |         |  |

Notes: Green circle=low risk; yellow circle=unclear; red circle=critical; D1=Can we be confident in the assessment of exposure?; D2=Can we be confident that cases had developed the outcome of interest and controls had not?; D3=Were the cases properly selected?; D4=Were the controls properly selected?; D5=Were cases and controls matched according to important prognostic variables or was statistical adjustment carried out for those variables?.
